# Supplementary material for: Nitrogen-doped hierarchically porous carbons for non-alkaline Zn–air battery cathodes
Source: Royal Society of Chemistry journal article supplement (doi:10.1039/d3ya00560g), 2023-12-22
Supplement: d3ya00560g1.pdf [file d3ya00560g1.pdf]

## Electronic Supplementary Information

# Nitrogen-doped hierarchically porous carbons for non-alkaline Zn-air battery cathodes

Roman R. Kapaev,<sup>1\*</sup> Yair Shahaf,<sup>2</sup> Masato Sonoo,<sup>1,3</sup> Amit Ohayon,<sup>1</sup> David Eisenberg<sup>2</sup> and Malachi Noked<sup>1\*</sup>

<sup>1</sup> Department of Chemistry and BINA – BIU Center for Nanotechnology and Advanced Materials, Bar-Ilan University, Ramat-Gan 5290002, Israel

<sup>2</sup> Schulich Faculty of Chemistry and the Grand Technion Energy Program Technion – Israel Institute of Technology, Technion City, Haifa 3200003, Israel

<sup>3</sup> R&D Division, Nichia Corporation, 491 Oka, Kaminaka, Anan, Tokushima 774-8601, Japan

\*E-mail: kapaevr@biu.ac.il (R.R.K.), malachi.noked@biu.ac.il (M.N.)

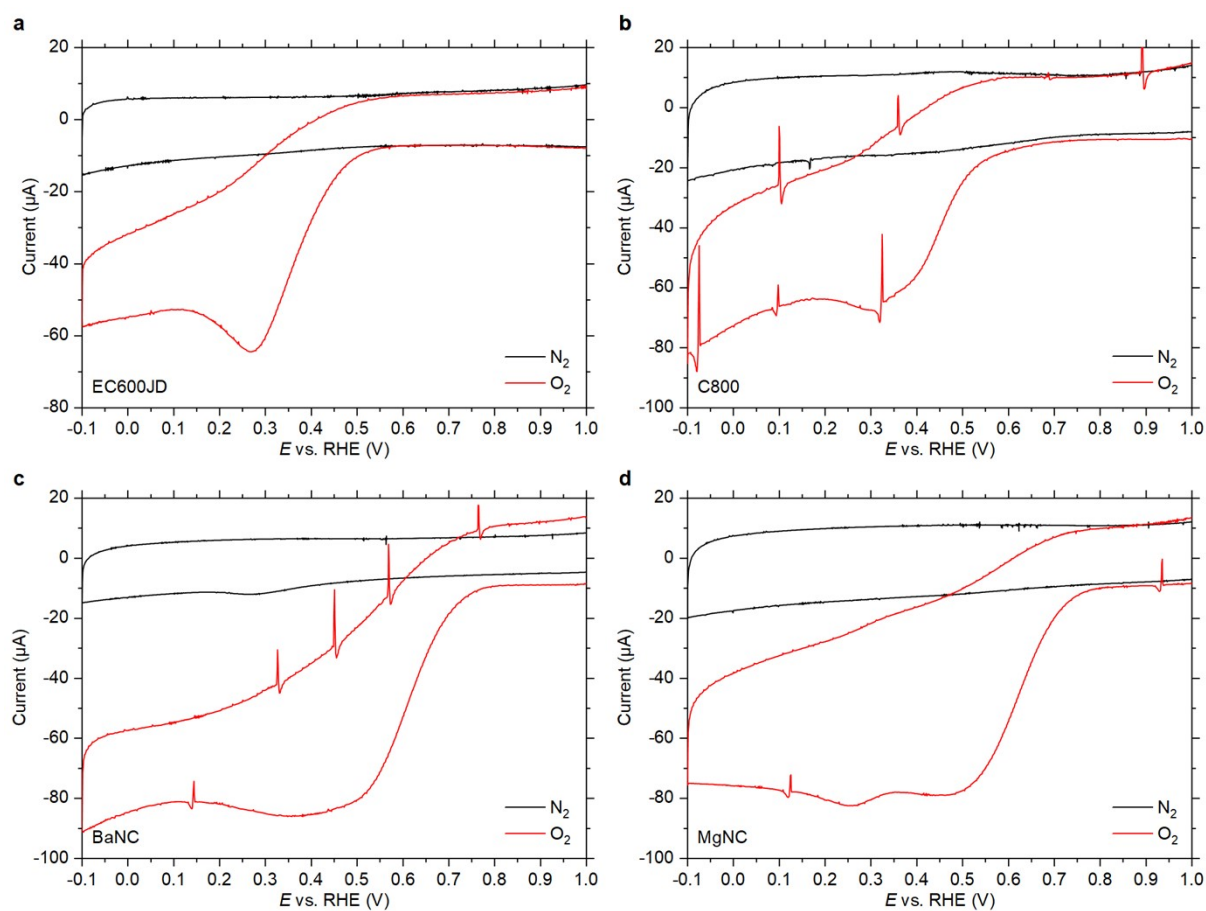

**Fig. S1.** CV response of EC600JD (a), C800 (b), BaNC (c) and MgNC (d) in nitrogen- and oxygen-saturated phosphate buffer solution (pH = 6.0).

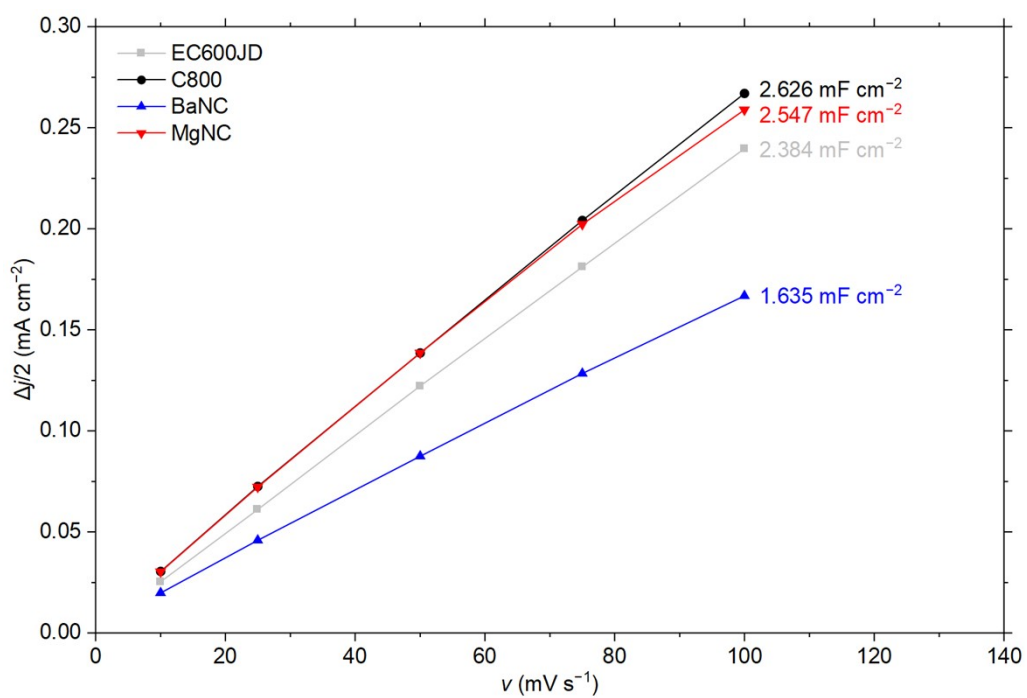

**Fig. S2.** Dependences between scan rate and supercapacitive current for carbon electrodes in nitrogen-saturated phosphate buffer solution (pH = 6.0).

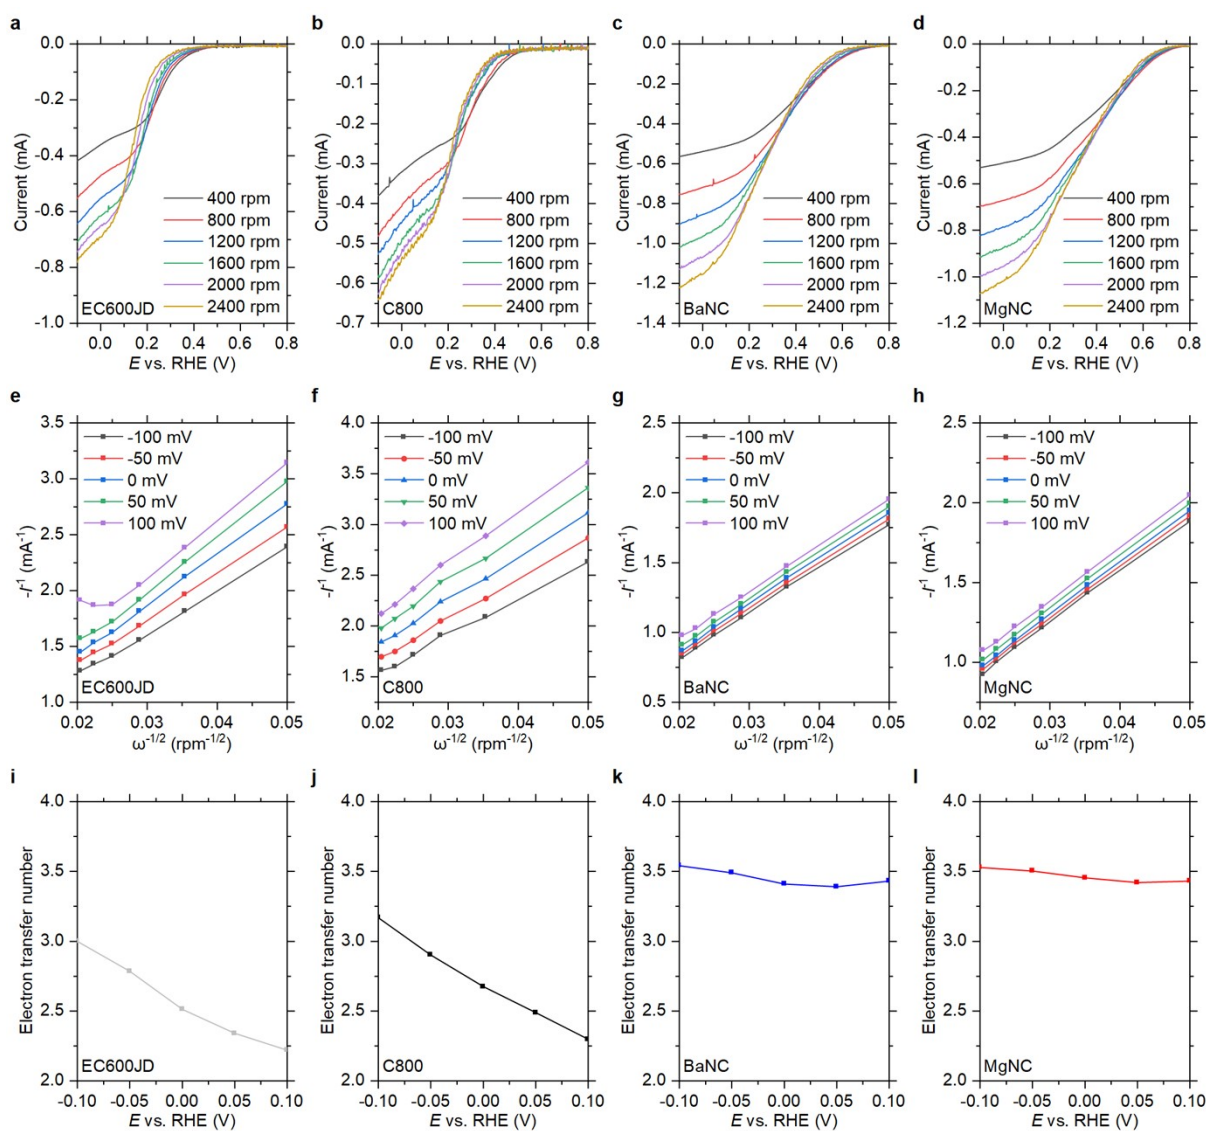

**Fig. S3.** RDE experiments (a-d), corresponding Koutecky–Levich plots for various potentials vs. RHE (e-h) and estimated electron transfer numbers (i-l) for EC600JD (a, e, i), C800 (b, f, j), BaNC (c, g, k) and MgNC (d, h, l), measured in oxygen-saturated phosphate buffer solution (pH = 6.0).

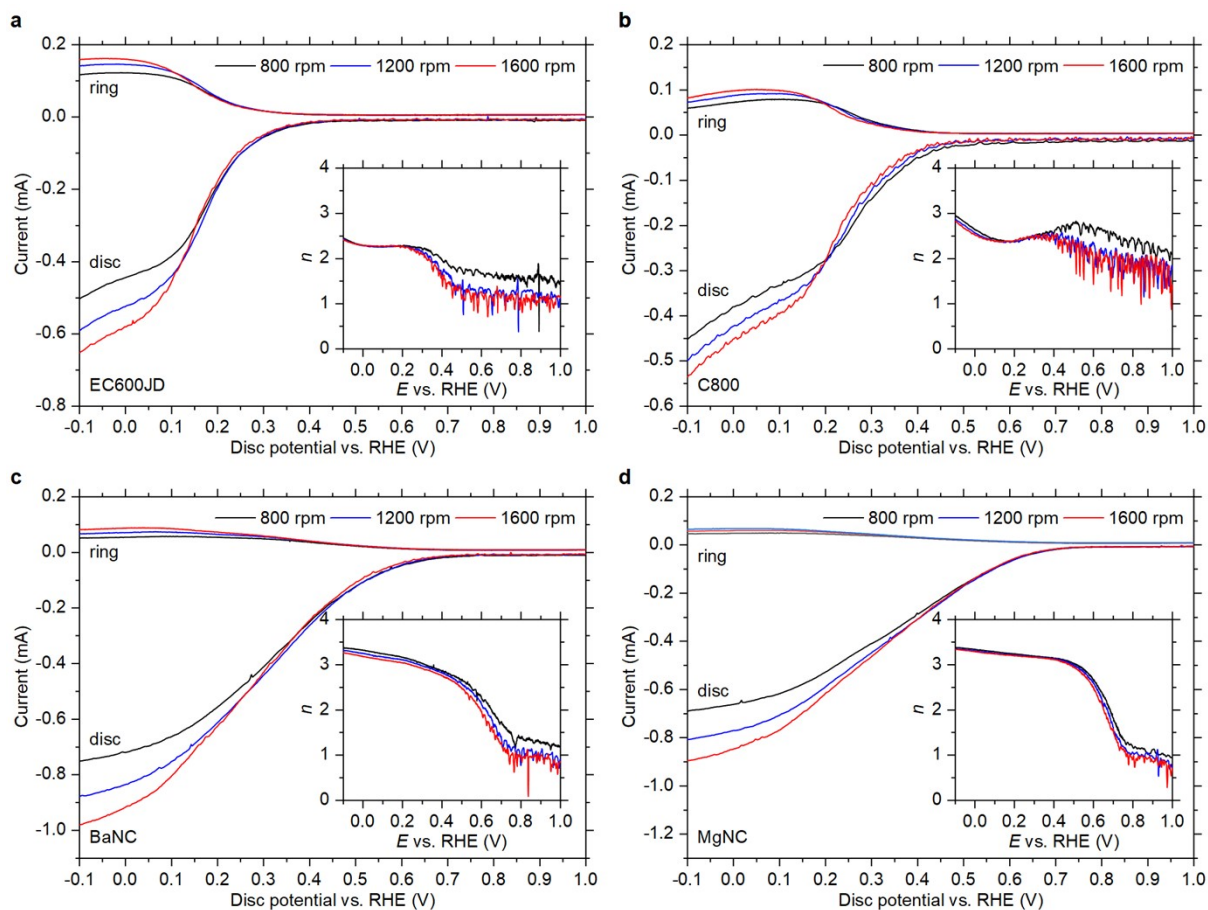

**Fig. S4.** Ring/disk currents and electron transfer numbers (insets) for EC600JD (a), C800 (b), BaNC (c) and MgNC (d) electrodes, measured in RRDE experiments with oxygen-saturated phosphate buffer solution (pH = 6.0).

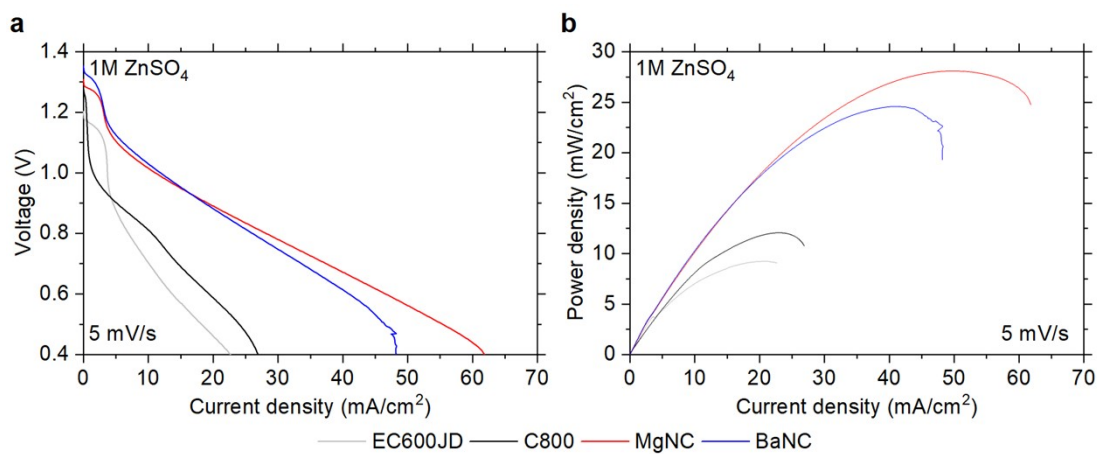

**Fig. S5.** Current-voltage (a) and current-power (b) plots for Zn-air cells with various cathode materials during an LSV scan ( $10 \text{ mV s}^{-1}$ ) with 1M ZnSO<sub>4</sub> electrolyte.

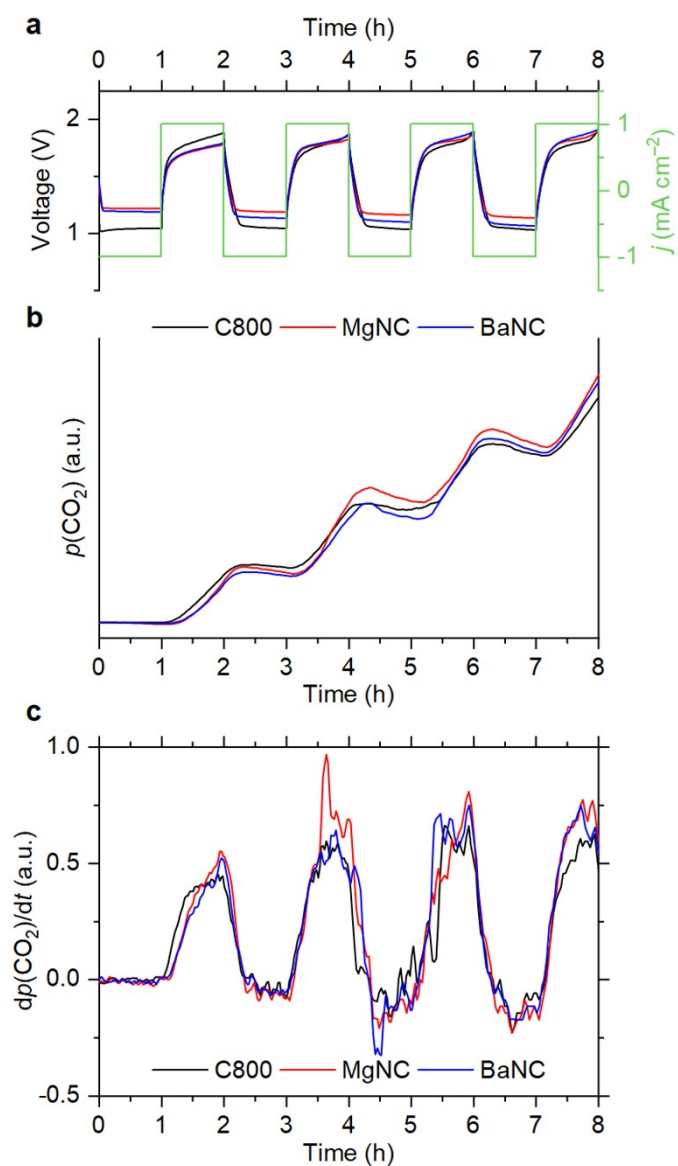

**Fig. S6.** Zn-air cell voltage and current density vs. time (a), evolution of CO<sub>2</sub> partial pressure (b) and its derivative (c) during the OEMS measurements.

**Table S1.** Performance of carbon-based materials in non-alkaline Zn-air batteries. The data (from this paper and ref. 14 in the main text) are reported for the ZAB setup that was used in this work; the current density is  $0.1 \text{ mA cm}^{-2}$ , the capacity is  $1 \text{ mAh cm}^{-2}$ . Reported roundtrip energy efficiencies, charge and discharge voltages are reported as average values for the first three cycles. Average voltage was calculated as charge or discharge energy ( $\text{mWh cm}^{-2}$ ) divided by capacity ( $\text{mAh cm}^{-2}$ ).

| Material    | Electrolyte             | Avg. discharge voltage (V) | Avg. charge voltage (V) | Roundtrip energy efficiency (%) | Source    |
|-------------|-------------------------|----------------------------|-------------------------|---------------------------------|-----------|
| MgNC        | 1M ZnSO <sub>4</sub>    | 1.28                       | 1.63                    | 78.8                            | This work |
|             | 1M Zn(OAc) <sub>2</sub> | 1.28                       | 1.54                    | 83.6                            |           |
| BaNC        | 1M ZnSO <sub>4</sub>    | 1.23                       | 1.67                    | 73.5                            | This work |
|             | 1M Zn(OAc) <sub>2</sub> | 1.24                       | 1.53                    | 80.9                            |           |
| C800        | 1M ZnSO <sub>4</sub>    | 1.16                       | 1.58                    | 73.5                            | This work |
|             | 1M Zn(OAc) <sub>2</sub> | 1.13                       | 1.52                    | 74.1                            |           |
| Ketjenblack | 1M ZnSO <sub>4</sub>    | 1.10                       | 1.67                    | 65.8                            | This work |
| EC600JD     | 1M Zn(OAc) <sub>2</sub> | 1.10                       | 1.59                    | 68.8                            |           |
| Ketjenblack | 1M ZnSO <sub>4</sub>    | 1.10                       | 1.68                    | 65.5                            | Ref. 14   |
| EC600JD     | 1M Zn(OAc) <sub>2</sub> | 1.10                       | 1.61                    | 68.4                            |           |
| YP80        | 1M ZnSO <sub>4</sub>    | 1.16                       | 1.62                    | 71.6                            | Ref. 14   |

|                                    |                         |      |      |      |         |
|------------------------------------|-------------------------|------|------|------|---------|
|                                    | 1M Zn(OAc) <sub>2</sub> | 1.11 | 1.55 | 71.8 |         |
| YP50F                              | 1M ZnSO <sub>4</sub>    | 1.17 | 1.66 | 70.2 | Ref. 14 |
|                                    | 1M Zn(OAc) <sub>2</sub> | 1.12 | 1.57 | 71.1 |         |
| BP2000                             | 1M ZnSO <sub>4</sub>    | 1.11 | 1.66 | 67.0 | Ref. 14 |
|                                    | 1M Zn(OAc) <sub>2</sub> | 1.09 | 1.58 | 69.1 |         |
| Graphene                           | 1M ZnSO <sub>4</sub>    | 1.11 | 1.70 | 65.6 | Ref. 14 |
| C500                               | 1M Zn(OAc) <sub>2</sub> | 1.08 | 1.64 | 66.0 |         |
| Ketjenblack                        | 1M ZnSO <sub>4</sub>    | 1.08 | 1.74 | 61.9 | Ref. 14 |
| EC300J                             | 1M Zn(OAc) <sub>2</sub> | 1.07 | 1.65 | 64.4 |         |
| Vulcan                             | 1M ZnSO <sub>4</sub>    | 1.01 | 1.78 | 56.8 | Ref. 14 |
| XC72R                              | 1M Zn(OAc) <sub>2</sub> | 1.01 | 1.75 | 57.7 |         |
| Multiwalled<br>carbon<br>nanotubes | 1M ZnSO <sub>4</sub>    | 1.01 | 1.80 | 56.0 | Ref. 14 |
|                                    | 1M Zn(OAc) <sub>2</sub> | 1.00 | 1.84 | 54.1 |         |
| Carbon<br>nanofibers               | 1M ZnSO <sub>4</sub>    | 0.82 | 2.09 | 39.2 | Ref. 14 |
|                                    | 1M Zn(OAc) <sub>2</sub> | 0.75 | 2.11 | 35.7 |         |

|         |                         |      |      |      |         |
|---------|-------------------------|------|------|------|---------|
| Super P | 1M ZnSO <sub>4</sub>    | 0.88 | 1.92 | 45.5 | Ref. 14 |
|         | 1M Zn(OAc) <sub>2</sub> | 0.90 | 1.90 | 47.1 |         |
